# Supplementary material
Source: MDPI journal article supplement (https://www.mdpi.com/2075-163X/13/7/973)
Supplement: s1 [file s1]

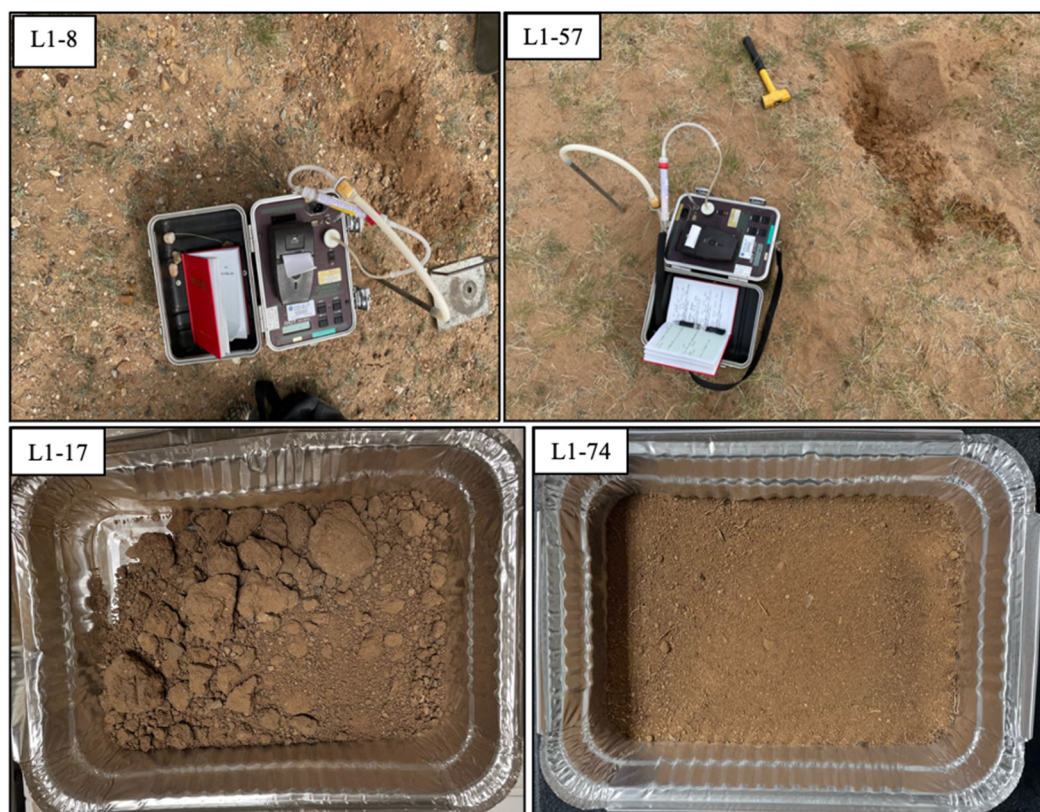

**Figure S1:** Surface soil conditions in the northern part of the orebody (L1-8, L1-17) and the southern part of the orebody (L1-57, L1-74) in the study area.
